# Supplementary material for: A systematic review of the effect of omega-3 supplements on meibomian gland dysfunction
Source: PubMed Central journal article supplement — Ther Adv Ophthalmol. 2020 Oct 16;12:2515841420952188. doi: 10.1177/2515841420952188 (PMC7576907; doi:10.1177/2515841420952188), 2020-10-16
Supplement: Supplement_Figure_S1.pdf [file Supplement_Figure_S1.pdf]

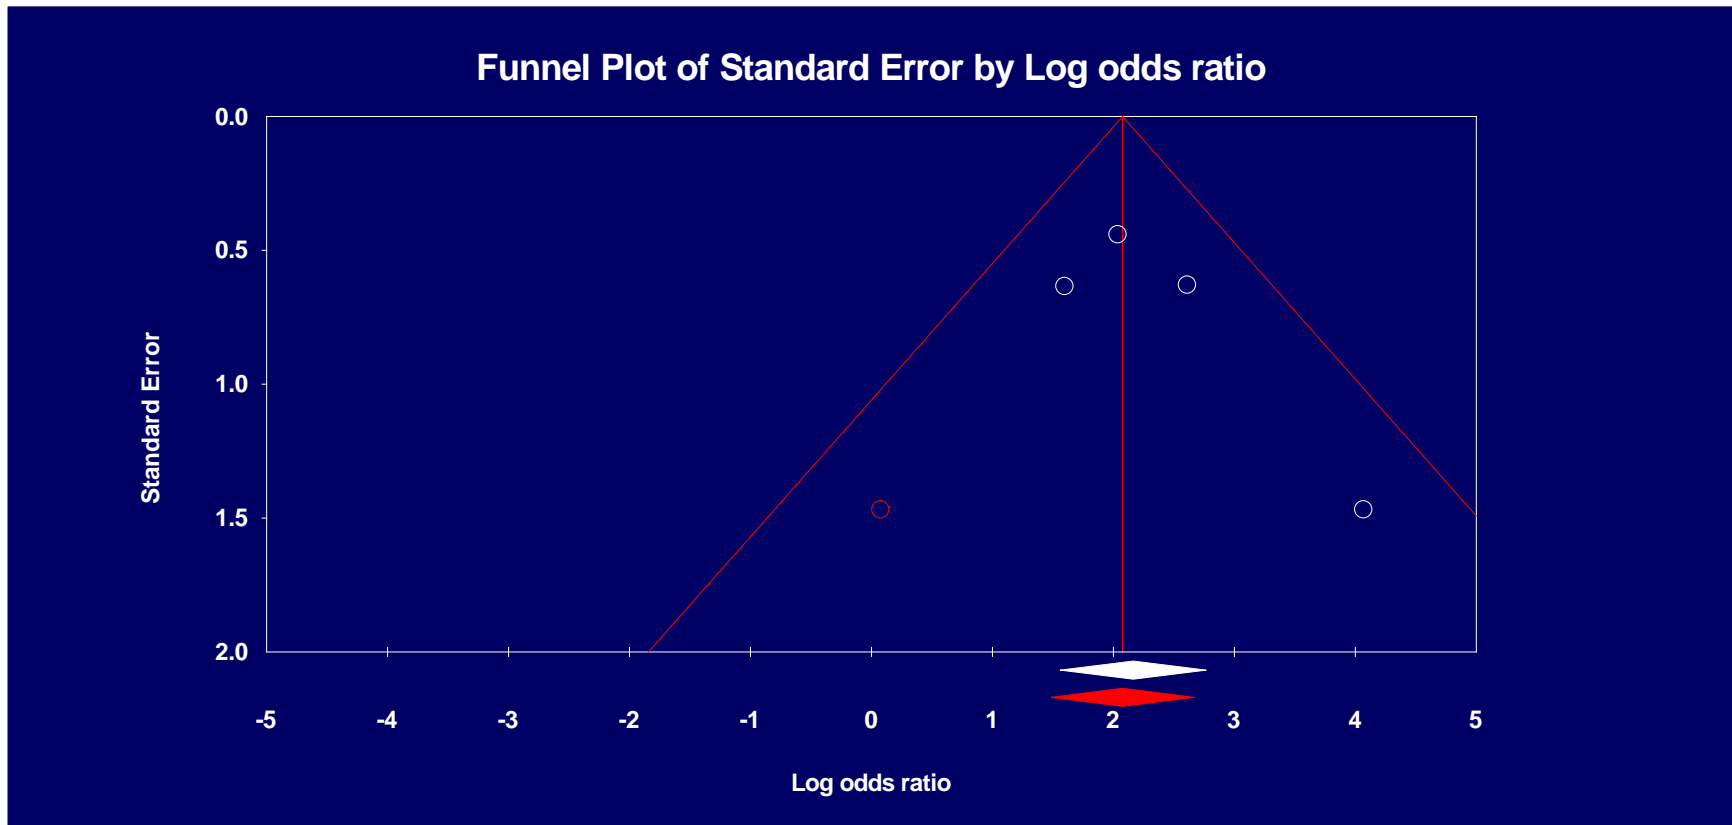

S1-Figure 1. Funnel plot of standard error by log risk ratio of the selected 4 studies (TBUT) showing symmetrical distribution of studies indicating absence of publication bias.
